# Supplementary material for: Reliability of heart rate and respiration rate measurements with a wireless accelerometer in postbariatric recovery
Source: PubMed Central journal article supplement (PMC8081266; doi:10.1371/journal.pone.0247903), 2021-04-28
Supplement: pone.0247903.s001.pdf [file pone.0247903.s001.pdf]

| # Patient | Mean differences<br>Patient monitor vs.<br>Healthdot | CI (mean + SD*1.96) | CI (mean-SD*1.96) |
|-----------|------------------------------------------------------|---------------------|-------------------|
| 1         | -7,65                                                | 36,22               | -51,51            |
| 2         | 0,68                                                 | 4,22                | -2,87             |
| 3         | 0,23                                                 | 1,94                | -1,48             |
| 4         | 0,79                                                 | 7,79                | -6,21             |
| 5         | -0,34                                                | 4,45                | -5,14             |
| 6         | 2,62                                                 | 13,19               | -7,95             |
| 7         | 0,45                                                 | 2,25                | -1,35             |
| 8         | 0,19                                                 | 2,84                | -2,45             |
| 9         | -26,32                                               | 34,56               | -87,19            |
| 10        | 0,54                                                 | 5,77                | -4,68             |
| 11        | 1,19                                                 | 8,74                | -6,37             |
| 12        | 0,59                                                 | 3,72                | -2,54             |
| 13        | -40,24                                               | 32,68               | -113,16           |
| 14        | 0,03                                                 | 1,65                | -1,58             |
| 15        | 0,93                                                 | 6,81                | -4,95             |
| 16        | 1,37                                                 | 7,62                | -4,88             |
| 17        | 0,73                                                 | 4,73                | -3,26             |
| 18        | -0,09                                                | 3,57                | -3,76             |
| 19        | 0,32                                                 | 3,47                | -2,83             |
| 20        | -0,24                                                | 2,43                | -2,90             |
| 21        | -0,40                                                | 4,24                | -5,03             |
| 22        | 0,23                                                 | 4,56                | -4,10             |
| 23        | 1,12                                                 | 6,34                | -4,09             |
| 24        | 0,03                                                 | 4,69                | -4,62             |
