# Supplementary material for: Reliability of heart rate and respiration rate measurements with a wireless accelerometer in postbariatric recovery
Source: PubMed Central journal article supplement (PMC8081266; doi:10.1371/journal.pone.0247903), 2021-04-28
Supplement: pone.0247903.s002.pdf [file pone.0247903.s002.pdf]

| # Patient | Mean differences Patient monitor vs. Healthdot | CI (mean + SD*1.96) | CI (mean-SD*1.96) |
|-----------|------------------------------------------------|---------------------|-------------------|
| 1         | -11,62                                         | 27,32               | -50,56            |
| 2         | 0,66                                           | 1,41                | -0,09             |
| 3         | 0,17                                           | 0,47                | -0,12             |
| 4         | 0,24                                           | 1,11                | -0,63             |
| 5         | -0,19                                          | 0,12                | -0,49             |
| 6         | NaN                                            | NaN                 | NaN               |
| 7         | 0,43                                           | 0,56                | 0,29              |
| 8         | 0,18                                           | 0,36                | -0,01             |
| 9         | NaN                                            | NaN                 | NaN               |
| 10        | 0,25                                           | 0,80                | -0,31             |
| 11        | 0,78                                           | 1,85                | -0,29             |
| 12        | 0,58                                           | 0,81                | 0,35              |
| 13        | -46,81                                         | 31,24               | -124,86           |
| 14        | -0,02                                          | 0,19                | -0,22             |
| 15        | 0,52                                           | 1,21                | -0,18             |
| 16        | NaN                                            | NaN                 | NaN               |
| 17        | 0,84                                           | 1,25                | 0,43              |
| 18        | -0,16                                          | 0,59                | -0,92             |
| 19        | 0,30                                           | 0,60                | 0,00              |
| 20        | -0,25                                          | -0,07               | -0,43             |
| 21        | -0,37                                          | 0,49                | -1,23             |
| 22        | -0,14                                          | NA                  | NA                |
| 23        | 1,18                                           | 1,55                | 0,81              |
| 24        | 0,01                                           | 0,29                | -0,28             |
