# Supplementary material for: Reliability of heart rate and respiration rate measurements with a wireless accelerometer in postbariatric recovery
Source: PubMed Central journal article supplement (PMC8081266; doi:10.1371/journal.pone.0247903), 2021-04-28
Supplement: pone.0247903.s003.pdf [file pone.0247903.s003.pdf]

| # Patient | Mean differences Patient monitor vs. Healthdot | CI (mean + SD*1.96) | CI (mean-SD*1.96) |
|-----------|------------------------------------------------|---------------------|-------------------|
| 1         | 1,10                                           | 8,37                | -6,16             |
| 2         | 0,44                                           | 3,53                | -2,65             |
| 3         | 0,59                                           | 5,76                | -4,57             |
| 4         | -0,21                                          | 5,24                | -5,66             |
| 5         | 1,35                                           | 9,03                | -6,33             |
| 6         | 0,11                                           | 6,62                | -6,41             |
| 7         | 5,69                                           | 13,89               | -2,51             |
| 8         | 0,60                                           | 3,57                | -2,37             |
| 9         | -1,34                                          | 1,81                | -4,48             |
| 10        | 0,76                                           | 6,15                | -4,64             |
| 11        | -0,36                                          | 6,36                | -7,08             |
| 12        | 0,40                                           | 4,20                | -3,39             |
| 13        | 2,30                                           | 9,14                | -4,54             |
| 14        | 4,00                                           | 13,66               | -5,66             |
| 15        | 0,13                                           | 6,04                | -5,77             |
| 16        | 5,57                                           | 17,39               | -6,25             |
| 17        | 1,57                                           | 4,41                | -1,28             |
| 18        | 1,96                                           | 8,11                | -4,20             |
| 19        | 1,68                                           | 6,75                | -3,39             |
| 20        | 0,92                                           | 3,69                | -1,85             |
| 21        | 1,41                                           | 6,81                | -3,98             |
| 22        | 1,00                                           | 4,10                | -2,11             |
| 23        | 0,75                                           | 4,46                | -2,97             |
| 24        | 1,49                                           | 7,13                | -4,15             |
| 25        | 0,46                                           | 4,71                | -3,79             |
| 26        | 2,66                                           | 10,21               | -4,90             |
