# Supplementary material for: Reliability of heart rate and respiration rate measurements with a wireless accelerometer in postbariatric recovery
Source: PubMed Central journal article supplement (PMC8081266; doi:10.1371/journal.pone.0247903), 2021-04-28
Supplement: pone.0247903.s004.pdf [file pone.0247903.s004.pdf]

| # Patient | Mean differences Patient monitor vs. Healthdot | CI (mean + SD*1.96) | CI (mean-SD*1.96) |
|-----------|------------------------------------------------|---------------------|-------------------|
| 1         | -0,29                                          | 2,78                | -3,36             |
| 2         | 0,33                                           | 1,60                | -0,94             |
| 3         | 0,09                                           | 1,09                | -0,90             |
| 4         | NaN                                            | NaN                 | NaN               |
| 5         | -0,01                                          | 1,25                | -1,28             |
| 6         | 0,60                                           | 1,34                | -0,14             |
| 7         | NaN                                            | NaN                 | NaN               |
| 8         | 0,58                                           | 1,98                | -0,81             |
| 9         | -1,27                                          | 0,08                | -2,63             |
| 10        | NaN                                            | NaN                 | NaN               |
| 11        | -0,16                                          | 1,40                | -1,72             |
| 12        | 0,03                                           | 1,17                | -1,11             |
| 13        | 2,23                                           | 5,57                | -1,11             |
| 14        | 2,48                                           | 8,14                | -3,19             |
| 15        | -0,40                                          | 1,54                | -2,33             |
| 16        | 7,03                                           | 12,55               | 1,51              |
| 17        | NaN                                            | NaN                 | NaN               |
| 18        | 1,52                                           | 3,18                | -0,14             |
| 19        | 1,47                                           | 3,80                | -0,86             |
| 20        | 0,90                                           | 2,22                | -0,42             |
| 21        | 1,14                                           | 3,81                | -1,54             |
| 22        | 1,12                                           | 2,27                | -0,03             |
| 23        | 0,46                                           | NaN                 | NaN               |
| 24        | NaN                                            | NaN                 | NaN               |
| 25        | 0,09                                           | 1,17                | -1,00             |
| 26        | 2,24                                           | 5,40                | -0,93             |
